# Supplementary material for: Brain iron deposition is linked with cognitive severity in Parkinson’s disease
Source: PubMed Central journal article supplement (PMC7147185; doi:10.1136/jnnp-2019-322042), 2020-02-20

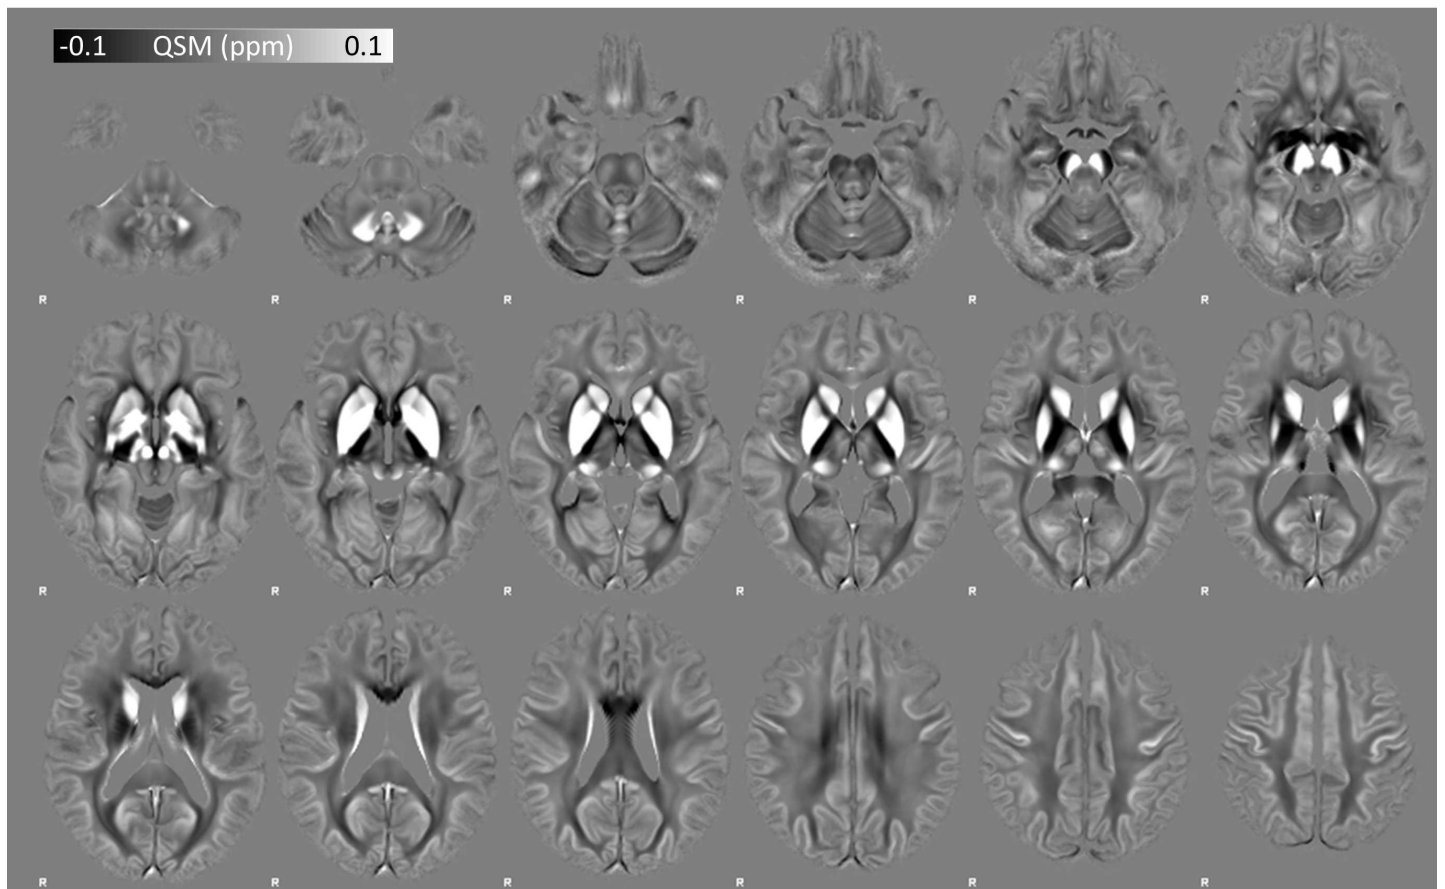

Supplement: jnnp-2019-322042supp001.pdf [file jnnp-2019-322042supp001.pdf]
